# Supplementary material for: Comprehensive analysis of the transcriptional expressions and prognostic value of S100A family in pancreatic ductal adenocarcinoma
Source: Research Square preprint supplement (doi:10.21203/rs.3.rs-148631/v1), 2021-01-19
Supplement: Supplementary file 1 [file a48aab375488151c7f46b930.docx]

| Characteristic | S100A2 low  (n = 41) | S100A2 high  (n = 2) | P value |
| --- | --- | --- | --- |
| Age |  |  | NA |
| ≥ 55 | 26 | 1 |  |
| < 55 | 15 | 1 |  |
| Sex |  |  | NA |
| Male | 28 | 2 |  |
| Female | 13 | 0 |  |
| Differentiated degree |  |  | NA |
| Well differentiated | 3 | 1 |  |
| Moderately differentiated | 26 | 0 |  |
| Poorly differentiated | 12 | 1 |  |
| Tumor size |  |  | NA |
| ≥ 5 | 29 | 1 |  |
| < 5 | 12 | 1 |  |
| Depth of invasion |  |  | NA |
| T1-2 | 24 | 1 |  |
| T3 | 12 | 1 |  |
| T4 | 5 | 0 |  |
| Lymph node |  |  | NA |
| No-1 | 36 | 1 |  |
| N2-3 | 5 | 1 |  |

Table S3 Basic characteristics of 43 PDAC patients
